# Supplementary material for: Deciphering the Phytochemical Profile of an Alpine Rose (Rhododendron ferrugineum L.) Leaf Extract for a Better Understanding of Its Senolytic and Skin-Rejuvenation Effects
Source: MDPI journal article supplement (doi:10.3390/cosmetics9020037), 2022-03-24
Supplement: s1 [file s1]

Deciphering the phytochemical profile of an Alpine rose (*Rhododendron ferrugineum* L.)  
leave extract for a better understanding of its senolytic and skin-rejuvenation effects

### Supplementary data

### NMR data (experimental data)

NMR data validated after interpretation of 1D and 2D NMR spectra ( $^1\text{H}$ ,  $^{13}\text{C}$ , HSQC, HMBC and COSY)

Spectrometer: Bruker Avance 600 MHz – cryoprobe

Solvent: DMSO- $d_6$

Note: Molecular structure numbering is different from the IUPAC numbering

## Naringenin

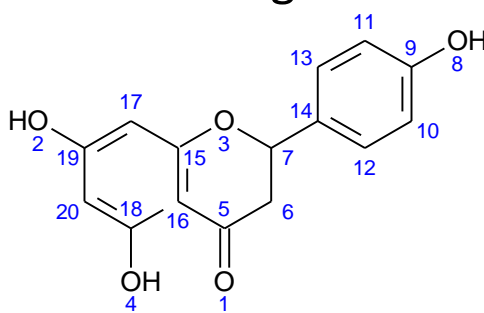

| $\text{C}_{15}\text{H}_{12}\text{O}_5$ | 272.2 g/mol           | CAS 480-41-1       |
|----------------------------------------|-----------------------|--------------------|
| Atom number                            | $^{13}\text{C}$ (ppm) | $^1\text{H}$ (ppm) |
| 5                                      | 196.8                 | -                  |
| 6                                      | 42.2                  | 2.68/3.27          |
| 7                                      | 78.9                  | 5.43               |
| 9                                      | 158.2                 | -                  |
| 10/11                                  | 115.5                 | 6.80               |
| 12/13                                  | 128.8                 | 7.33               |
| 14                                     | 129.4                 | -                  |
| 15                                     | 163.2                 | -                  |
| 16                                     | 102.2                 | -                  |
| 17                                     | 95.4                  | 5.88               |
| 18                                     | 163.9                 | -                  |
| 19                                     | 167.1                 | -                  |
| 20                                     | 96.2                  | 5.88               |

## *p*-anisic acid

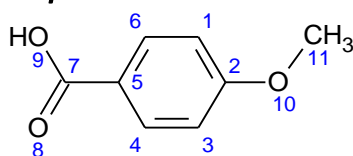

C<sub>8</sub>H<sub>8</sub>O<sub>3</sub>

152.1 g/mol

CAS 100-09-4

| Atom number | <sup>13</sup> C (ppm) | <sup>1</sup> H (ppm) |
|-------------|-----------------------|----------------------|
| 1/3         | 114.3                 | 7.03                 |
| 2           | 163.3                 | -                    |
| 4/6         | 131.8                 | 7.89                 |
| 5           | 123.5                 | -                    |
| 7           | 167.5                 | -                    |
| 11          | 55.9                  | 3.82                 |

## Farrerol

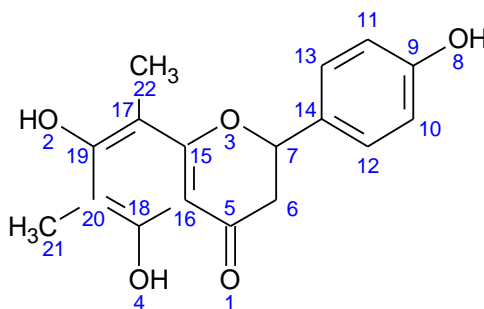

C<sub>17</sub>H<sub>16</sub>O<sub>5</sub>

300.3 g/mol

CAS 24211-30-1

| Atom number | <sup>13</sup> C (ppm) | <sup>1</sup> H (ppm) |
|-------------|-----------------------|----------------------|
| 5           | 197.2                 | -                    |
| 6           | 42.4                  | 2.74/3.20            |
| 7           | 78.2                  | 5.42                 |
| 9           | 158.0                 | -                    |
| 10/11       | 115.6                 | 6.80                 |
| 12/13       | 128.4                 | 7.32                 |
| 14          | 129.7                 | -                    |
| 15          | 157.9                 | -                    |
| 16          | 102.1                 | -                    |
| 17          | 103.0                 | -                    |
| 18          | 158.8                 | -                    |
| 19          | 162.9                 | -                    |
| 20          | 103.6                 | -                    |
| 21          | 7.9                   | 1.95                 |
| 22          | 8.5                   | 1.93                 |

# Methyl-orcellinate

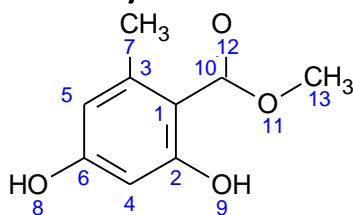

| C <sub>9</sub> H <sub>10</sub> O <sub>4</sub> 182.2 g/mol CAS 3187-58-4 |                       |                      |
|-------------------------------------------------------------------------|-----------------------|----------------------|
| Atom number                                                             | <sup>13</sup> C (ppm) | <sup>1</sup> H (ppm) |
| 1                                                                       | 107.7                 | -                    |
| 2                                                                       | 161.3                 | -                    |
| 3                                                                       | 141.2                 | -                    |
| 4                                                                       | 100.7                 | 6.15                 |
| 5                                                                       | 110.4                 | 6.17                 |
| 6                                                                       | 161.3                 | -                    |
| 7                                                                       | 22.3                  | 2.28                 |
| 10                                                                      | 170.2                 | -                    |
| 13                                                                      | 52.0                  | 3.78                 |

# Orcinol

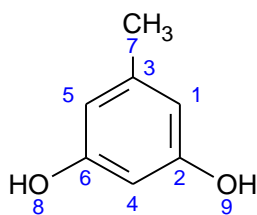

| C <sub>7</sub> H <sub>8</sub> O <sub>2</sub> 124.2 g/mol CAS 504-15-4 |                       |                      |
|-----------------------------------------------------------------------|-----------------------|----------------------|
| Atom number                                                           | <sup>13</sup> C (ppm) | <sup>1</sup> H (ppm) |
| 1/5                                                                   | 107.3                 | 6.00                 |
| 2/6                                                                   | 158.5                 | -                    |
| 3                                                                     | 139.1                 | -                    |
| 4                                                                     | 99.7                  | 5.99                 |
| 7                                                                     | 21.5                  | 2.10                 |

## Poriol

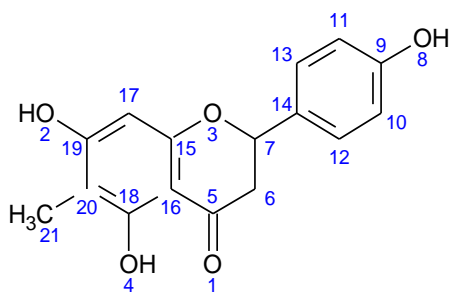

C<sub>16</sub>H<sub>14</sub>O<sub>5</sub>

286.3 g/mol

CAS 14348-16-4

| Atom number | <sup>13</sup> C (ppm) | <sup>1</sup> H (ppm) |
|-------------|-----------------------|----------------------|
| 5           | 196.6                 | -                    |
| 6           | 42.2                  | 2.75/3.27            |
| 7           | 78.6                  | 5.40                 |
| 9           | 158.1                 | -                    |
| 10/11       | 115.3                 | 6.80                 |
| 12/13       | 128.3                 | 7.32                 |
| 14          | 128.9                 | -                    |
| 15          | 161.0                 | -                    |
| 16          | 101.8                 | -                    |
| 17          | 94.5                  | 5.98                 |
| 18          | 160.8                 | -                    |
| 19          | 164.6                 | -                    |
| 20          | 163.2                 | -                    |
| 21          | 7.2                   | 1.88                 |

## Phloroacetophenone

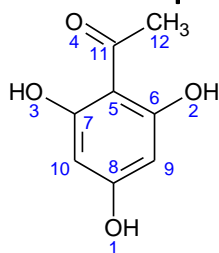

C<sub>8</sub>H<sub>8</sub>O<sub>4</sub>

168.1 g/mol

CAS 480-66-0

| Atom number | <sup>13</sup> C (ppm) | <sup>1</sup> H (ppm) |
|-------------|-----------------------|----------------------|
| 5           | 104.5                 | -                    |
| 6/7         | 157.7                 | -                    |
| 8           | 165.3                 | -                    |
| 9/10        | 94.9                  | 5.80                 |
| 11          | 202.9                 | -                    |
| 12          | 32.7                  | 2.54                 |

## α-monocaprylin

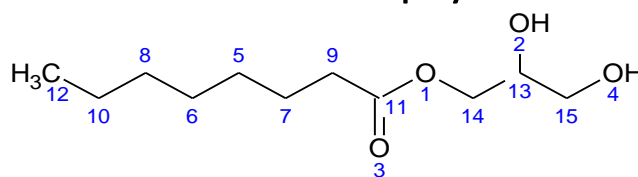

| C <sub>11</sub> H <sub>22</sub> O <sub>4</sub> |                       |                      | 218.3 g/mol | CAS 502-54-5 |
|------------------------------------------------|-----------------------|----------------------|-------------|--------------|
| Atom number                                    | <sup>13</sup> C (ppm) | <sup>1</sup> H (ppm) |             |              |
| 5                                              | 28.8                  | 1.25                 |             |              |
| 6                                              | 29.0                  | 1.26                 |             |              |
| 7                                              | 24.6                  | 1.50                 |             |              |
| 8                                              | 31.7                  | 1.23                 |             |              |
| 9                                              | 33.5                  | 2.28                 |             |              |
| 10                                             | 22.2                  | 1.26                 |             |              |
| 11                                             | 173.3                 | -                    |             |              |
| 12                                             | 14.2                  | 0.86                 |             |              |
| 13                                             | 69.5                  | 3.63                 |             |              |
| 14                                             | 65.8                  | 3.90/4.03            |             |              |
| 15                                             | 63.0                  | 3.33                 |             |              |

## Monoacetin

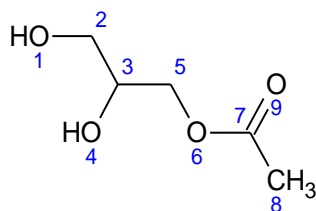

| C <sub>5</sub> H <sub>10</sub> O <sub>4</sub> |                       |                      | 134.1 g/mol | CAS 106-61-6 |
|-----------------------------------------------|-----------------------|----------------------|-------------|--------------|
| Atom number                                   | <sup>13</sup> C (ppm) | <sup>1</sup> H (ppm) |             |              |
| 2                                             | 63.1                  | 3.33                 |             |              |
| 3                                             | 69.7                  | 3.63                 |             |              |
| 5                                             | 66.0                  | 3.89/4.03            |             |              |
| 7                                             | 170.7                 | -                    |             |              |
| 8                                             | 21.1                  | 2.01                 |             |              |

# Benzyl glucopyranoside

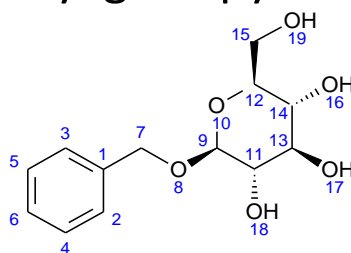

C<sub>13</sub>H<sub>18</sub>O<sub>6</sub>

270.3 g/mol

CAS 4304-12-5

| Atom number | <sup>13</sup> C (ppm) | <sup>1</sup> H (ppm) |
|-------------|-----------------------|----------------------|
| 1           | 138.6                 | -                    |
| 2/3         | 128.1                 | 7.39                 |
| 4/5         | 128.6                 | 7.34                 |
| 6           | 127.9                 | 7.28                 |
| 7           | 69.9                  | 4.85/4.82            |
| 9           | 102.5                 | 4.22                 |
| 11          | 73.9                  | 3.04                 |
| 12          | 77.1                  | 3.10                 |
| 13          | 77.3                  | 3.14                 |
| 14          | 70.6                  | 3.06                 |
| 15          | 62.7                  | 3.35/3.43            |

# (+)-catechin

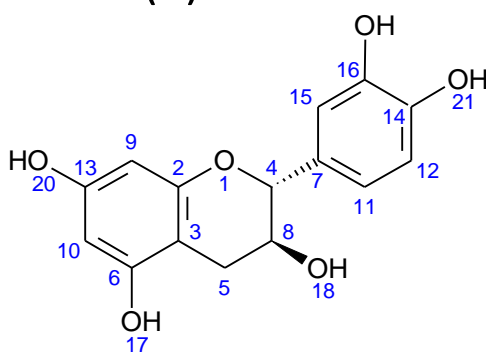

C<sub>15</sub>H<sub>14</sub>O<sub>6</sub>

290.3 g/mol

CAS 154-23-4

| Atom number | <sup>13</sup> C (ppm) | <sup>1</sup> H (ppm) |
|-------------|-----------------------|----------------------|
| 2           | 155.7                 | -                    |
| 3           | 99.6                  | -                    |
| 4           | 81.4                  | 4.48                 |
| 5           | 28.3                  | 2.66/2.35            |
| 6           | 156.6                 | -                    |
| 7           | 131.0                 | -                    |
| 8           | 66.6                  | 3.81                 |
| 9           | 95.6                  | 5.89                 |
| 10          | 94.1                  | 5.68                 |
| 11          | 118.8                 | 6.59                 |
| 12          | 115.3                 | 6.68                 |
| 13          | 156.8                 | -                    |
| 14          | 145.3                 | -                    |
| 15          | 114.9                 | 6.72                 |
| 16          | 145.2                 | -                    |

## Benzoic acid

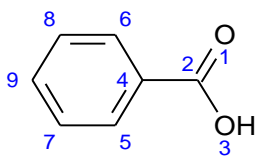

| C <sub>7</sub> H <sub>6</sub> O <sub>2</sub> |                       | 122.1 g/mol          | CAS 65-85-0 |
|----------------------------------------------|-----------------------|----------------------|-------------|
| Atom number                                  | <sup>13</sup> C (ppm) | <sup>1</sup> H (ppm) |             |
| 2                                            | 168.1                 | -                    |             |
| 4                                            | 131.0                 | -                    |             |
| 5                                            | 129.5                 | 7.96                 |             |
| 6                                            | 129.5                 | 7.96                 |             |
| 7                                            | 128.8                 | 7.51                 |             |
| 8                                            | 128.8                 | 7.51                 |             |
| 9                                            | 132.8                 | 7.63                 |             |

## Isovanillic acid

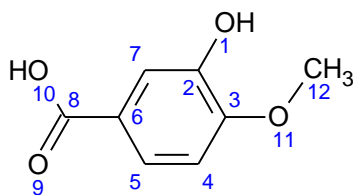

| C <sub>8</sub> H <sub>8</sub> O <sub>4</sub> |                       | 168.1 g/mol          | CAS 645-08-9 |
|----------------------------------------------|-----------------------|----------------------|--------------|
| Atom number                                  | <sup>13</sup> C (ppm) | <sup>1</sup> H (ppm) |              |
| 2                                            | 148.9                 | -                    |              |
| 3                                            | 152.9                 | -                    |              |
| 4                                            | 111.4                 | 7.04                 |              |
| 5                                            | 123.5                 | 7.56                 |              |
| 6                                            | Nd*                   | -                    |              |
| 7                                            | 112.4                 | 7.44                 |              |
| 8                                            | 167.7                 | -                    |              |
| 12                                           | 56.0                  | 3.82                 |              |

Nd\* not well detected



## Taxifolin 3-*O*-arabinoside (isomer 1 / isomer 2)

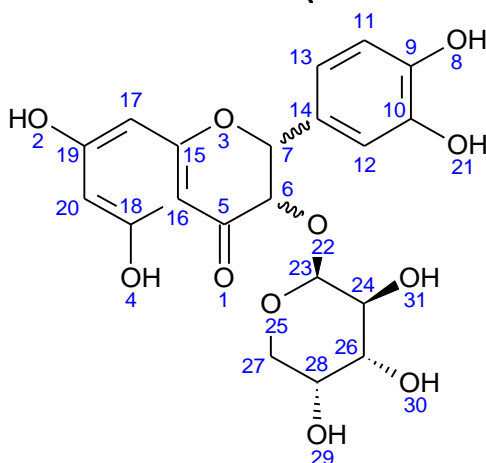

| C <sub>20</sub> H <sub>20</sub> O <sub>11</sub> |                       | 436.4 g/mol           | CAS ?? (two isomers) |
|-------------------------------------------------|-----------------------|-----------------------|----------------------|
| Atom number                                     | <sup>13</sup> C (ppm) | <sup>1</sup> H (ppm)  |                      |
| 5                                               | 193.7 (193.7)         | -                     |                      |
| 6                                               | 75.3 (75.7)           | 4.68 (4.62)           |                      |
| 7                                               | 81.5 (81.7)           | 5.34 (5.35)           |                      |
| 9                                               | 146.2 (146.2)         | -                     |                      |
| 10                                              | 145.5 (145.7)         | -                     |                      |
| 11                                              | 115.8 (115.8)         | 6.70 (6.72)           |                      |
| 12                                              | 115.1 (115.1)         | 6.85 (6.79)           |                      |
| 13                                              | 119.1 (119.1)         | 6.71 (6.64)           |                      |
| 14                                              | 127.1 (127.3)         | -                     |                      |
| 15                                              | 162.2 (162.4)         | -                     |                      |
| 16                                              | 100.9 (101.1)         | -                     |                      |
| 17                                              | 95.6 (95.6)           | 5.87 (5.87)           |                      |
| 18                                              | 164.0 (164.0)         | -                     |                      |
| 19                                              | 168.5 (168.5)         | -                     |                      |
| 20                                              | 96.4 (96.4)           | 5.86 (5.86)           |                      |
| 23                                              | 100.8 (102.9)         | 3.95 (4.63)           |                      |
| 24                                              | 70.2 (70.7)           | 3.36 (3.49)           |                      |
| 26                                              | 71.8 (72.0)           | 3.39 (3.40)           |                      |
| 27                                              | 62.4 (63.2)           | 3.24/3.74 (3.15/3.28) |                      |
| 28                                              | 65.3 (66.1)           | 3.65 (3.60)           |                      |

# Quercetin-3-*O*-galactoside / Hyperoside

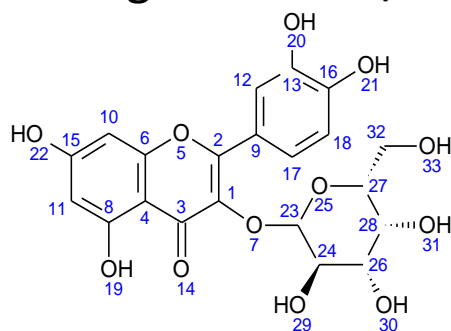

C<sub>21</sub>H<sub>20</sub>O<sub>12</sub>

464.4 g/mol

CAS: 482-36-0

| Atom number | <sup>13</sup> C (ppm) | <sup>1</sup> H (ppm) |
|-------------|-----------------------|----------------------|
| 1           | 133.8                 | -                    |
| 2           | 156.6                 | -                    |
| 3           | 177.9                 | -                    |
| 4           | 104.3                 | -                    |
| 6           | 156.7                 | -                    |
| 8           | 161.6                 | -                    |
| 9           | 121.5                 | -                    |
| 10          | 93.9                  | 6.41                 |
| 11          | 99.1                  | 6.21                 |
| 12          | 116.4                 | 7.54                 |
| 13          | 145.2                 | -                    |
| 15          | 164.6                 | -                    |
| 16          | 148.9                 | -                    |
| 17          | 122.4                 | 7.67                 |
| 18          | 115.6                 | 6.82                 |
| 23          | 102.2                 | 5.39                 |
| 24          | 71.6                  | 3.57                 |
| 26          | 73.6                  | 3.38                 |
| 27          | 76.2                  | 3.33                 |
| 28          | 68.4                  | 3.65                 |
| 32          | 60.6                  | 3.30/3.46            |

# Lupeol

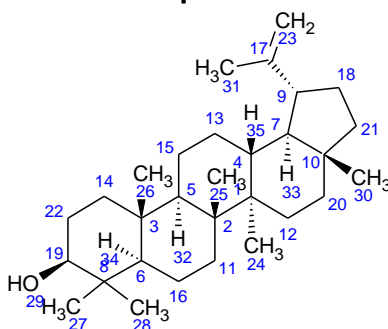

C<sub>30</sub>H<sub>50</sub>O

426.7 g/mol

CAS 545-47-1

| Atom number | <sup>13</sup> C (ppm) | <sup>1</sup> H (ppm) |
|-------------|-----------------------|----------------------|
| 1           | 42.8                  | -                    |
| 2           | 40.6                  | -                    |
| 3           | 37.1                  | -                    |
| 4           | 38.0                  | 1.62                 |
| 5           | 50.3                  | 1.24                 |
| 6           | 55.2                  | 0.63                 |
| 7           | 48.2                  | 1.33                 |
| 8           | 38.8                  | -                    |
| 9           | 47.9                  | 2.37                 |
| 10          | 43.0                  | -                    |
| 11          | 34.3                  | 1.33                 |
| 12          | 27.4                  | 0.96/1.62            |
| 13          | 25.0                  | 1.02/1.62            |
| 14          | 38.7                  | 0.83/1.56            |
| 15          | 20.9                  | 1.18/1.35            |
| 16          | 18.4                  | 1.34/1.45            |
| 17          | 150.7                 | -                    |
| 18          | 29.6                  | 1.24                 |
| 19          | 77.2                  | 2.97                 |
| 20          | 35.5                  | 1.44/1.36            |
| 21          | 40.0                  | 1.19/1.34            |
| 22          | 27.6                  | 1.44                 |
| 23          | 110.2                 | 4.54/4.68            |
| 24          | 14.8                  | 0.91                 |
| 25          | 16.2                  | 0.99                 |
| 26          | 16.4                  | 0.77                 |
| 27          | 28.5                  | 0.87                 |
| 28          | 16.3                  | 0.66                 |
| 30          | 18.2                  | 0.76                 |
| 31          | 19.4                  | 1.65                 |
